# Supplementary material for: A water stable layered Tb(iii) polycarboxylate with high proton conductivity over 10−2 S cm−1 in a wide temperature range
Source: Royal Society of Chemistry journal article supplement (doi:10.1039/c8cc08706g), 2019-01-01
Supplement: c8cc08706g1.pdf [file c8cc08706g1.pdf]

# **A water stable layered Tb(III) polycarboxylate with high proton conductivity over $10^{-2} \text{ S}\cdot\text{cm}^{-1}$ in a wide temperature range**

**Lu Feng,<sup>1a</sup> Hui-Sheng Wang,<sup>1a</sup> Hai-Long Xu,<sup>a</sup> Wen-Tao Huang,<sup>a</sup> Tian-Yu Zeng,<sup>a</sup> Qing-Rong Cheng,<sup>a</sup> Zhi-Quan Pan<sup>a</sup> and Hong Zhou<sup>\*a</sup>**

<sup>a</sup> College of Chemistry and Environmental Technology, Wuhan Institute of Technology, Wuhan 430073, Hubei, China

<sup>1</sup> These two authors contributed same to this article.

\*Corresponding author: [hzhohu@126.com](mailto:hzhohu@126.com)

## **Supporting Information**

## Experimental

### 1. Materials

Chemical reagents were purchased commercially and used as received without further purification. The ligand of 1,3,5-triazine-2,4,6-triamine hexaacetic acid ( $H_6TTHA$ ) was prepared according to the method reported in literature.<sup>1</sup>

### 2. Physical measurements

Elemental analysis (C, H and N) was performed by using a Perkin-Elmer 2400 series II CHN analyzer. The powder X-ray diffraction measurement was conducted on a Bruker D8 ADVANCE X-ray diffractometer. Infrared (IR) spectrum was recorded in the range 4000 - 400  $cm^{-1}$  on a FT-IR analyzer (1601, Shimadzu Co., Japan) by using KBr-pellet method. Thermogravimetric analyses was carried out on a NETZSCH STA 449C unit at a heating rate of 10  $^{\circ}C\ min^{-1}$  under a nitrogen atmosphere.

### 3. Synthesis of complex $\{[Tb_4(TTHA)_2(H_2O)_4] \cdot 7H_2O\}_n$ (**1**)

$H_6TTHA$  (0.082 mmol, 0.0388 g),  $Tb(NO_3)_3 \cdot 6H_2O$  (0.04 mmol, 0.0178 g), 2 mL water and 1 mL acetonitrile were added in 10 mL vial. Then, 70  $\mu L$  6 mol/L HCl was added. The vial was kept in an autoclave at 140  $^{\circ}C$  for three days. Colorless crystals were obtained and washed with deionized water. Yield: 32.83 mg (58%, based on Tb). Anal. Calcd. For  $C_{30}H_{46}N_{12}O_{35}Tb_4$ : C, 20.35; H, 2.62; N, 9.49%. Found: C, 20.73; H, 2.21; N, 9.83%. Main IR data (KBr,  $cm^{-1}$ ): 3447(m), 3188(m), 2935(w), 1553(s), 1491(m), 1429(w), 1309(s), 1195(s), 991(m).

### 4. X-ray crystallography

Single-crystal X-ray diffraction data for **1** was collected at 173 K on a Bruker Smart CCD area-detector diffractometer with graphite-monochromatic Mo/ $K\alpha$  radiation ( $\lambda = 0.71073\ \text{\AA}$ ) in  $\omega$ -scan mode. The collected data were reduced using the software package SAINT<sup>2</sup> and semi-empirical absorption correction was applied to the intensity data using SADABS program.<sup>3</sup> The structure of **1** was solved using direct methods, and all nonhydrogen atoms were refined anisotropically by least squares on  $F^2$  using the SHELXTL-2014 program.<sup>4</sup> Hydrogen atoms were placed in calculated positions and refined isotropically using the riding model. Details of the crystallographic data and selected bond lengths ( $\text{\AA}$ ) as well as angles ( $^{\circ}$ ) for **1** are summarized in Table S1 and Table S2, respectively. In this heavy-atom structure as it was not possible to see clear electron-density peaks in difference maps which would correspond with acceptable locations for the various H atoms bonded to water oxygen atoms, the refinement was completed with no allowance for these water H atoms in the model.

### 5. Proton Conductivity Studies

Electrical characterization was carried out on a cylindrical pellet ( $\sim 10$  mm of diameter and 0.5 mm of thickness) obtained by pressing  $\sim 50$  mg of sample at 500 MPa for 5 min. The pellet was pressed between porous C electrodes (Sigracet, GDL 10 BB, no Pt). Impedance spectroscopy data were collected using a HP4284A impedance analyzer over the frequency range from 20 Hz to 1 MHz with an applied voltage of 0.2 V. Electrical measurements were taken at different temperature (287 - 358 K) and relative humidity (60%, 70%, 80%, 90% and 98%). All measurements were electronically controlled by the winDETA package of programs.<sup>5</sup>

**Table S1** Crystallographic data and refinement parameters of **1**

| <b>1</b>                                                                             |                                                                                 |
|--------------------------------------------------------------------------------------|---------------------------------------------------------------------------------|
| CCDC number                                                                          | 1876158                                                                         |
| Empirical formula                                                                    | C <sub>30</sub> H <sub>46</sub> N <sub>12</sub> O <sub>35</sub> Tb <sub>4</sub> |
| Formula weigh                                                                        | 1770.47                                                                         |
| Temperature/K                                                                        | 173                                                                             |
| Crystal system                                                                       | triclinic                                                                       |
| Space group                                                                          | <i>P</i> $\bar{1}$                                                              |
| <i>a</i> /Å                                                                          | 10.7095(7)                                                                      |
| <i>b</i> /Å                                                                          | 11.3590(6)                                                                      |
| <i>c</i> /Å                                                                          | 12.0866(7)                                                                      |
| $\alpha$ /°                                                                          | 62.703(2)                                                                       |
| $\beta$ /°                                                                           | 74.569(2)                                                                       |
| $\gamma$ /°                                                                          | 68.667(2)                                                                       |
| <i>V</i> /Å <sup>3</sup>                                                             | 1208.29(13)                                                                     |
| <i>Z</i>                                                                             | 1                                                                               |
| <i>D</i> <sub>calc</sub> /g cm <sup>-3</sup>                                         | 2.433                                                                           |
| $\mu$ /mm <sup>-1</sup>                                                              | 5.905                                                                           |
| <i>F</i> (000)                                                                       | 850.0                                                                           |
| <i>h</i> , <i>k</i> , <i>l</i> max                                                   | 12, 13, 14                                                                      |
| No. of parameters                                                                    | 370                                                                             |
| <i>S</i>                                                                             | 1.011                                                                           |
| <i>R</i> <sub>1</sub> , <i>wR</i> <sub>2</sub> [ <i>I</i> > 2 $\sigma$ ( <i>I</i> )] | 0.0389, 0.0634                                                                  |
| $\Delta\rho$ <sub>max</sub> and $\Delta\rho$ <sub>min</sub> , e Å <sup>-3</sup>      | 0.745, 0.605                                                                    |

**Table S2** Selected bond lengths (Å) of **1**.

| <b>1</b>              |          |                        |          |
|-----------------------|----------|------------------------|----------|
| Tb1-O1                | 2.540(6) | Tb1-O9 <sup>i</sup>    | 2.527(7) |
| Tb1-O2                | 2.397(7) | Tb1-O4 <sup>i</sup>    | 2.217(5) |
| Tb1-O5                | 2.310(6) | Tb1-O9 <sup>ii</sup>   | 2.387(6) |
| Tb1-O10 <sup>i</sup>  | 2.435(5) | Tb1-O12                | 2.365(4) |
| Tb2-O3                | 2.342(7) | Tb2-O6 <sup>i</sup>    | 2.328(5) |
| Tb2-O7 <sup>i</sup>   | 2.303(6) | Tb2-O7 <sup>iii</sup>  | 2.571(4) |
| Tb2-O8 <sup>iii</sup> | 2.459(5) | Tb2-O11 <sup>iii</sup> | 2.338(6) |
| Tb2-O13               | 2.318(5) | Tb2-O14 <sup>i</sup>   | 2.387(6) |

Symmetry codes (<sup>i</sup>: 1-x, -y, 1-z; <sup>ii</sup>: 1+x, y, z; <sup>iii</sup>: x, -1+y, 1+z)

**Table S3** The resistance (R) and conductivity ( $\sigma$ ) of **1** under different temperature and 98% relative humidity. The values of pellet dimensions including sample thickness (*l*) and diameter are 500  $\mu\text{m}$  and 2 mm, respectively.

| Temperature (K) | R ( $\Omega$ ) | $\sigma$ (S/cm)       |
|-----------------|----------------|-----------------------|
| 287             | 287.87         | $5.53 \times 10^{-3}$ |
| 289             | 250.40         | $6.36 \times 10^{-3}$ |
| 291             | 200.93         | $7.93 \times 10^{-3}$ |
| 293             | 169.53         | $9.39 \times 10^{-3}$ |
| 295             | 145.17         | $1.10 \times 10^{-2}$ |
| 297             | 119.73         | $1.33 \times 10^{-2}$ |
| 313             | 89.93          | $1.77 \times 10^{-2}$ |
| 333             | 61.96          | $2.57 \times 10^{-2}$ |
| 358             | 76.40          | $2.08 \times 10^{-2}$ |

**Table S4** The resistance (R) and conductivity ( $\sigma$ ) of **1** under different relative humidity (RH) and 297 K.

| RH (%) | R ( $\Omega$ )     | $\sigma$ (S/cm)       |
|--------|--------------------|-----------------------|
| 60     | $1.14 \times 10^5$ | $1.40 \times 10^{-5}$ |
| 70     | $3.92 \times 10^4$ | $4.07 \times 10^{-5}$ |
| 80     | $2.49 \times 10^4$ | $6.39 \times 10^{-5}$ |
| 90     | $1.10 \times 10^4$ | $1.45 \times 10^{-4}$ |
| 98     | 119.73             | $1.33 \times 10^{-2}$ |

**Table S5** The resistance (R) and conductivity ( $\sigma$ ) of **1** (297 K and 98% RH) under different time.

| Time (h) | R ( $\Omega$ ) | $\sigma$ (S/cm)       |
|----------|----------------|-----------------------|
| 0        | 119.73         | $1.33 \times 10^{-2}$ |
| 2        | 126.38         | $1.26 \times 10^{-2}$ |
| 4        | 123.04         | $1.29 \times 10^{-2}$ |
| 6        | 121.74         | $1.31 \times 10^{-2}$ |
| 8        | 120.09         | $1.33 \times 10^{-2}$ |

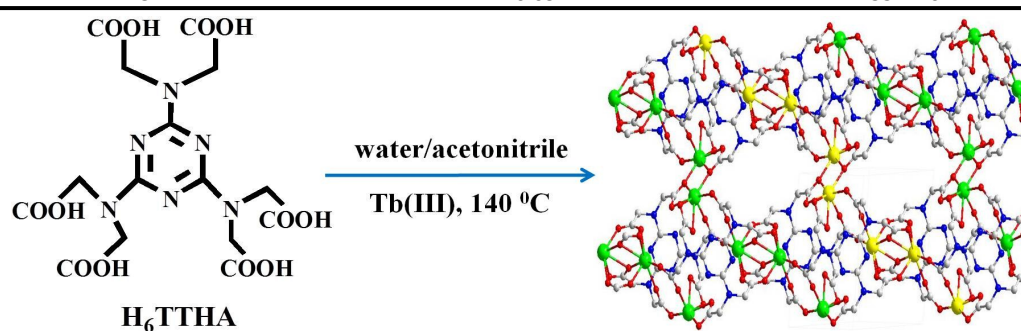

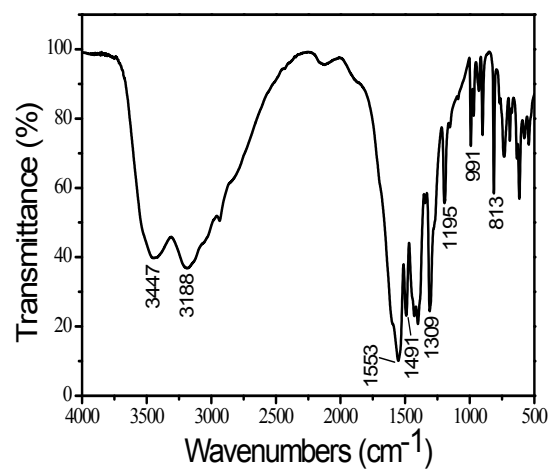

**Fig. S2** The IR spectra of complex **1**.

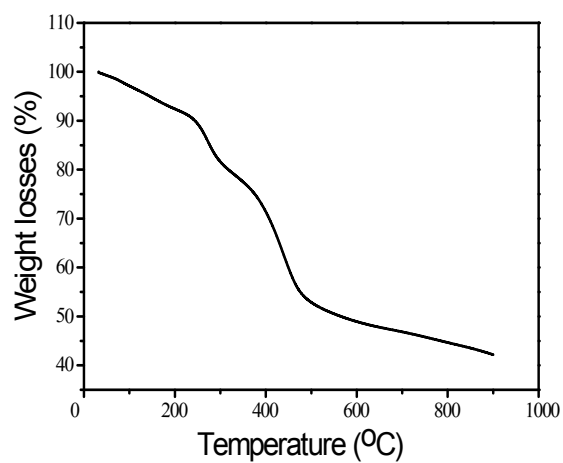

**Fig. S3** The TGA curve of complex **1**.

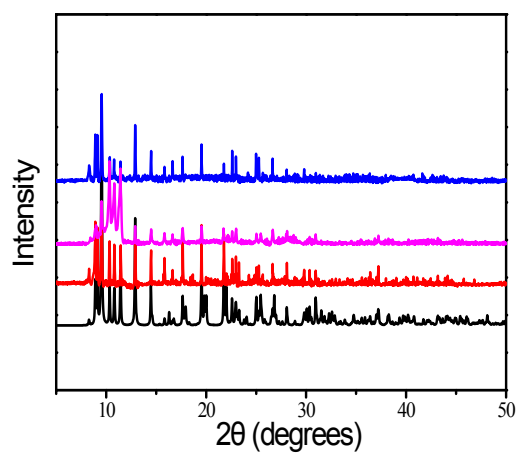

**Fig. S4** Powder X-ray diffraction spectra for **1** in different conditions. Simulated (black), As-synthesized (red), Immersed in water for a week (magenta) and Post-impedance (blue).

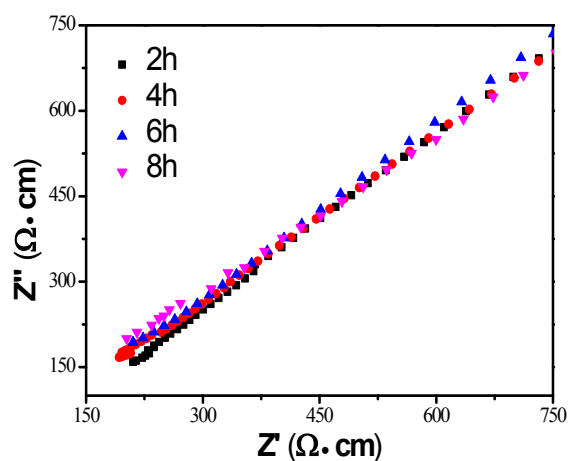

**Fig. S5** The Nyquist plots for proton conductivity of **1** (297 K and 98% RH) at 2h, 4h, 6h and 8h.

### References

1. P. de Hoog, P. Gamez, W. L. Driessen and J. Reedijk, *Tetrahedron Lett.*, 2002, **43**, 6783.
2. M. Er, R. Ustabaş, U. Coruh, K. Sancak, E. Vázquez-López, *Int. J. Mol. Sci.*, 2008, **9**, 1000.
3. G. M. Sheldrick, SADABS: Program for Empirical Absorption Correction of Area Detector Data, University of Göttingen, Germany, 1996.
4. G. M. Sheldrick, SHELX2013, Programs for Crystal Structure Analysis; Institut für Anorganische Chemie der Universität: Göttingen, Germany, 1998.
5. *winDETA*, Novocontrol GmbH: Hundsangen, Germany, 1995.
